# Supplementary material for: Safety and Privacy Outcomes From a Moderated Online Social Therapy for Young People With First-Episode Psychosis
Source: Atypon-hosted journal article supplement (doi:10.1176/appi.ps.201300078), 2014-04-01
Supplement: 546_ds001.pdf [file 546_ds001.pdf]

## Supplementary Online material

Figure 1 shows “Caz’s” interactions with the early warning signs module where she can identify her early warning signs of relapse and develop a relapse prevention plan.

Figure 2 shows “Caz’s” interaction with the “job zone” where she can access information related to job searching and interact online with Gina – a vocational rehabilitation specialist.

Figure 3 shows a screen shot populated with test content of the newsfeed function for “Dave”. The left hand menu shows Dave’s progress through the psychoeducation module and the right hand menu shows the cafe options.

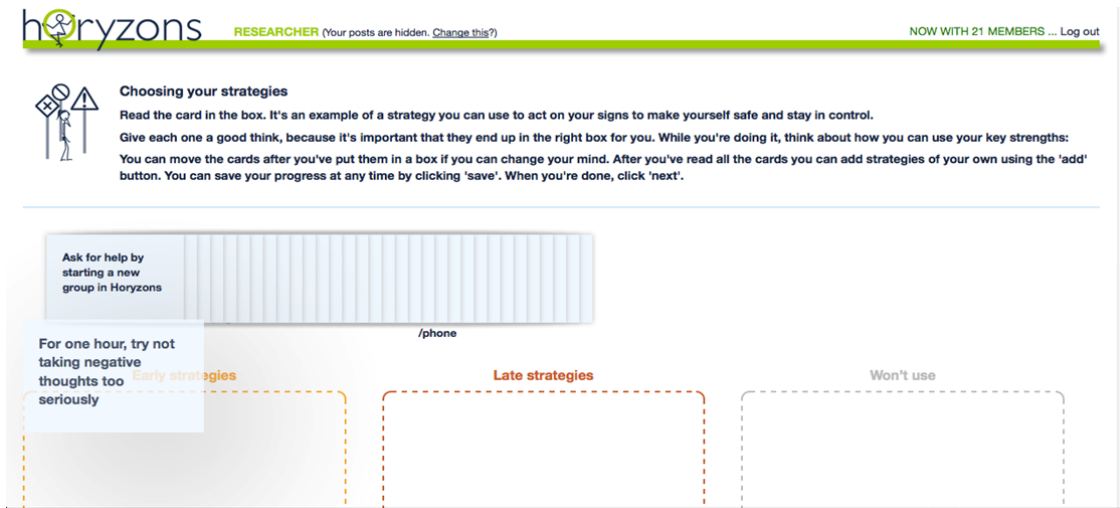

Figure 1. Screen shot from the early warning signs module.

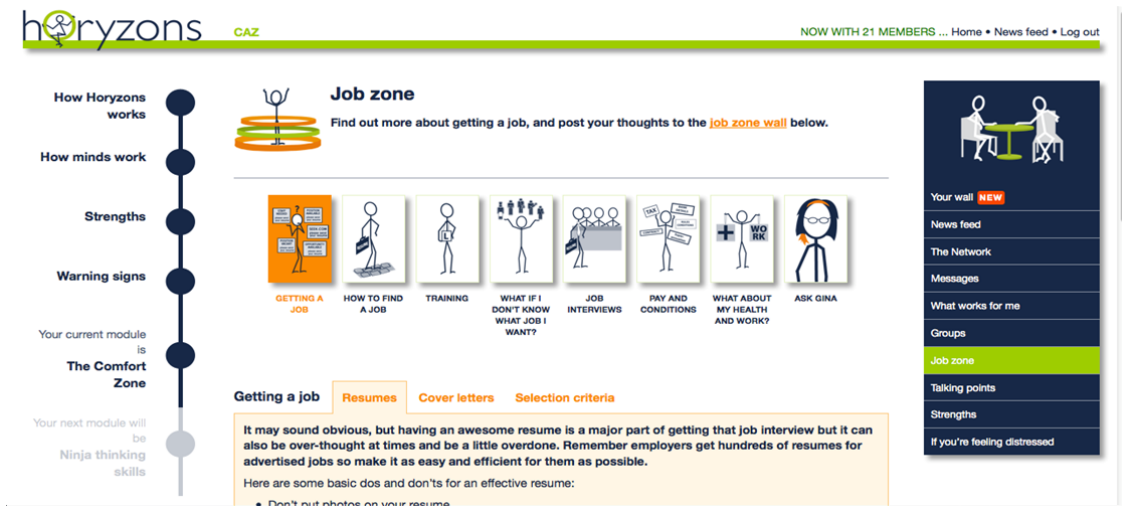

Figure 2. Screen shot of the job zone for “Caz”.

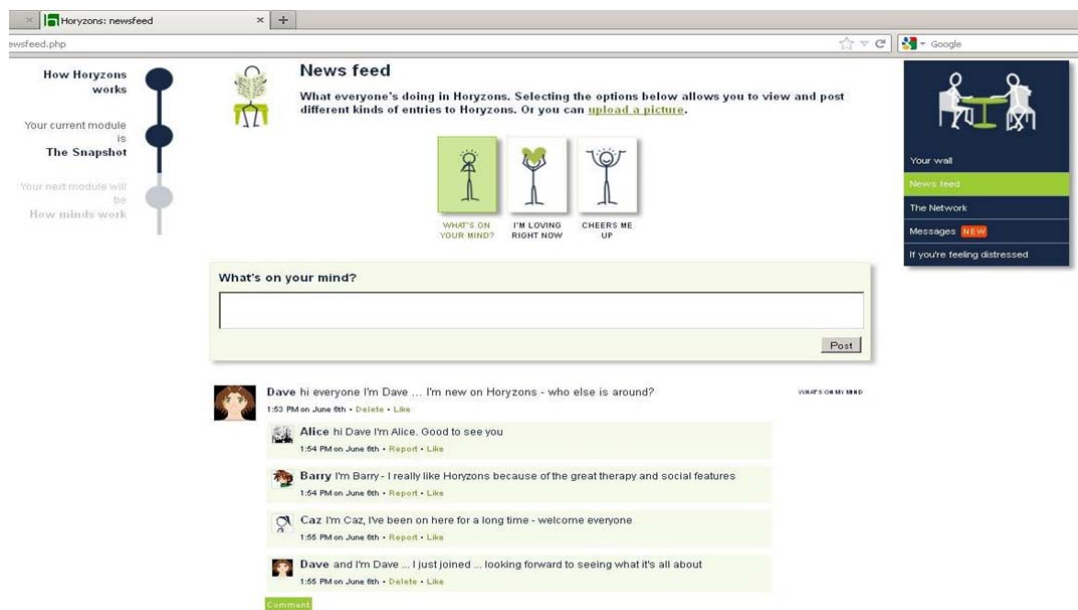

Figure 3. Screen shot of the newsfeed function showing a user post and comments on the post.

| Name                        | Sources | References | Created On         | Created By | Modified On        | Modified By |  |
|-----------------------------|---------|------------|--------------------|------------|--------------------|-------------|--|
| Individual site features    | 0       | 0          | 2/04/2012 11:49 AM | GW         | 2/04/2012 11:59 AM | GW          |  |
| Groups                      | 9       | 9          | 2/04/2012 9:34 AM  | GW         | 2/04/2012 10:47 AM | GW          |  |
| individual Modules          | 12      | 13         | 2/04/2012 10:00 AM | GW         | 2/04/2012 11:44 AM | GW          |  |
| Job zone                    | 4       | 4          | 2/04/2012 9:59 AM  | GW         | 2/04/2012 11:43 AM | GW          |  |
| Message system              | 11      | 12         | 2/04/2012 9:34 AM  | GW         | 2/04/2012 11:44 AM | GW          |  |
| Moderation                  | 12      | 13         | 2/04/2012 9:36 AM  | GW         | 2/04/2012 11:41 AM | GW          |  |
| Notifications and Reminders | 7       | 7          | 2/04/2012 9:40 AM  | GW         | 2/04/2012 11:44 AM | GW          |  |
| Road Map                    | 14      | 18         | 2/04/2012 9:35 AM  | GW         | 2/04/2012 11:55 AM | GW          |  |
| Strengths home page         | 4       | 5          | 2/04/2012 9:59 AM  | GW         | 2/04/2012 11:40 AM | GW          |  |
| Talking Points              | 9       | 10         | 2/04/2012 9:59 AM  | GW         | 2/04/2012 10:36 AM | GW          |  |
| Wall and Newsfeed           | 17      | 17         | 2/04/2012 9:34 AM  | GW         | 2/04/2012 11:44 AM | GW          |  |
| What Works For Me           | 5       | 5          | 2/04/2012 9:59 AM  | GW         | 2/04/2012 10:31 AM | GW          |  |
| Properties of the site      | 0       | 0          | 2/04/2012 11:52 AM | GW         | 2/04/2012 11:53 AM | GW          |  |
| Confidential                | 6       | 6          | 2/04/2012 9:36 AM  | GW         | 2/04/2012 10:41 AM | GW          |  |
| Layout                      | 5       | 6          | 2/04/2012 10:42 AM | GW         | 2/04/2012 11:56 AM | GW          |  |
| Safety                      | 14      | 14         | 2/04/2012 9:35 AM  | GW         | 2/04/2012 11:44 AM | GW          |  |
| Suggestions for future      | 0       | 0          | 2/04/2012 11:51 AM | GW         | 2/04/2012 11:54 AM | GW          |  |
| Continue using              | 9       | 9          | 2/04/2012 9:35 AM  | GW         | 2/04/2012 11:45 AM | GW          |  |
| How many users              | 4       | 5          | 2/04/2012 9:39 AM  | GW         | 2/04/2012 11:45 AM | GW          |  |
| Improvements                | 10      | 10         | 2/04/2012 9:36 AM  | GW         | 2/04/2012 11:41 AM | GW          |  |
| User Experience             | 0       | 0          | 2/04/2012 11:51 AM | GW         | 2/04/2012 11:51 AM | GW          |  |
| Miscellaneous comments      | 7       | 7          | 2/04/2012 9:35 AM  | GW         | 2/04/2012 11:58 AM | GW          |  |
| Non-use                     | 2       | 2          | 2/04/2012 9:38 AM  | GW         | 2/04/2012 10:16 AM | GW          |  |
| Other users                 | 11      | 13         | 2/04/2012 10:01 AM | GW         | 2/04/2012 11:57 AM | GW          |  |
| Positive experience         | 3       | 3          | 2/04/2012 10:05 AM | GW         | 2/04/2012 11:58 AM | GW          |  |
| Recommend to others         | 13      | 13         | 2/04/2012 9:58 AM  | GW         | 2/04/2012 11:44 AM | GW          |  |

### **Explanation of coding hierarchy**

Participant interviews were analysed according to the method described in 'Data Analysis', yielding the following major themes:.

#### **Individual site features**

Participants commented on individual features of the application. The sub-categories record comments about the Groups feature (group problem-solving), the Psychoeducation modules, the 'Job zone' feature, the one-to-one messaging feature, moderation of the system, notifications and reminders, , the strengths and 'what works for me' features, the wall or newsfeed, and the 'talking points' discussion systems built into the psychoeducation modules.

#### **Properties of the site**

Participants commented on general aspects of the site such as visual layout, whether they felt their profile information was confidential, and whether they felt safe on HORYZONS.

#### **Suggestions for future**

Participants commented on whether they felt it would be helpful to continue using HORYZONS, on what would be the ideal number of users on HORYZONS, and on what improvements they would like to see made to the site.

#### **User experience**

Participants commented on whether they had a positive experience on HORYZONS, whether they found the presence of other users on the site helpful to their recovery, and whether they would recommend the system to others. Here we also coded comments on "non use" of the site, as well as miscellaneous comments about the experience of using HORYZONS.
